# Supplementary material for: Origins and insights into the historic Judean date palm based on genetic analysis of germinated ancient seeds and morphometric studies
Source: PubMed Central journal article supplement — Sci Adv. 2020 Feb 5;6(6):eaax0384. doi: 10.1126/sciadv.aax0384 (PMC7002127; doi:10.1126/sciadv.aax0384), 2020-02-05
Supplement: aax0384_SM.pdf [file aax0384_SM.pdf]

## Supplementary Materials for

### Origins and insights into the historic Judean date palm based on genetic analysis of germinated ancient seeds and morphometric studies

Sarah Sallon\*, Emira Cherif, Nathalie Chabrillange, Elaine Solowey, Muriel Gros-Balthazard, Sarah Ivorra, Jean-Frédéric Terral, Markus Egli, Frédérique Aberlenc\*

\*Corresponding author. Email: ssallon@hadassah.org.il (S.S.); frederique.aberlenc@ird.fr (F.A.)

Published 5 February 2020, *Sci. Adv.* **6**, eaax0384 (2020)  
DOI: 10.1126/sciadv.aax0384

#### This PDF file includes:

Fig. S1. Map of Judean desert sites where ancient seeds were discovered.

Fig. S2. PCA comparing current and ancient date (*P. dactylifera*) seeds.

Fig. S3. Log probabilities between  $K$  values according to (44).

Table S1. Judean desert archaeological sources of ancient date seeds and their preliminary measurements before planting.

Table S2. Calibrated calendar ages of germinated ancient date seeds and controls.

Table S3. Size parameters of 18 ungerminated ancient date seeds retrieved from potting soil.

Table S4. Comparison of 18 ungerminated ancient date seeds with current date seeds from cultivated varieties and wild individual date palms.

Table S5. Date palm varieties used for the genotyping reference matrix to compare ancient genotypes with current varieties.

Table S6. Genetic diversity within ancient genotypes and geographic date palm groups.

Table S7. Genetic distances (Cavalli-Sforza and Edwards) between ancient genotypes and current varieties.

**Table S1. Judean desert archaeological sources of ancient date seeds and their preliminary measurements before planting.**

| <b>Archaeological site/<br/>Ancient date seed<br/>code No.</b> | <b>Germinated<br/>ancient date seeds<br/>with identifying<br/>moniker</b> | <b>Length<br/>(mm)</b> | <b>Weight<br/>(g)</b> |
|----------------------------------------------------------------|---------------------------------------------------------------------------|------------------------|-----------------------|
| <b><u>Qumran</u></b>                                           |                                                                           |                        |                       |
| <b><u>(Cave FQ37)</u></b>                                      |                                                                           |                        |                       |
| HU-37-A1                                                       |                                                                           | 26.7                   | 1.61                  |
| HU-37-A2                                                       |                                                                           | 28.8                   | 1.79                  |
| HU-37-A3                                                       |                                                                           | 30.8                   | 1.99                  |
| HU-37-A4                                                       | <i>Jonah</i>                                                              | 27.0                   | 1.72                  |
| HU-37-A5                                                       |                                                                           | 31.0                   | 1.70                  |
| HU-37-A6                                                       | <i>Uriel</i>                                                              | 29.0                   | 1.64                  |
| HU-37-A7                                                       |                                                                           | 33.1                   | 1.84                  |
| HU-37-A8                                                       | <i>Boaz</i>                                                               | 26.0                   | 1.35                  |
| HU-37-A9                                                       |                                                                           | 30.0                   | 1.89                  |
| HU-37-A10                                                      |                                                                           | 27.3                   | 1.48                  |
| HU-37-A11                                                      |                                                                           | 23.6                   | 1.42                  |
| HU-37 -A12                                                     |                                                                           | 29.0                   | 1.54                  |
| HU-37-A13                                                      |                                                                           | 19.9                   | 0.79                  |
| <b><u>Qumran</u></b>                                           |                                                                           |                        |                       |
| <b><u>(Cave I3)</u></b>                                        |                                                                           |                        |                       |
| HU-Q13 -A22                                                    |                                                                           | 27.0                   | 1.38                  |
| HU Q-13-A23                                                    | <i>Judith</i>                                                             | 23.0                   | 1.09                  |
| HU-Q13-A24                                                     |                                                                           | 29.8                   | 1.66                  |
| HU-Q13-A25                                                     |                                                                           | 28.5                   | 1.69                  |
| <b><u>Wadi Makukh :</u></b>                                    |                                                                           |                        |                       |
| <b><u>(Cave I)</u></b>                                         |                                                                           |                        |                       |
| HU-WMK-A14                                                     | <i>Hannah</i>                                                             | 33.0                   | 2.55                  |
| HU-LMK-A26                                                     |                                                                           | 31.5                   | 1.83                  |

|                                                                |             |      |      |
|----------------------------------------------------------------|-------------|------|------|
| <b><u>Wadi Makukh</u></b><br><i>(Lower Makukh, Cave 6)</i>     |             |      |      |
| HU-LMK-A15                                                     |             | 27.0 | 2.06 |
| HU-LMK-A16                                                     |             | 27.6 | 1.66 |
| HU-LMK-A17                                                     |             | 25.0 | 1.56 |
| <b><u>Wadi Makukh</u></b><br><i>(Makukh Qurantel) Cave 24)</i> |             |      |      |
| HU-MQ-A18                                                      |             | 33.2 | 1.84 |
| <b><u>Wadi Makukh</u></b><br><i>(Lower Makukh) Cave 3)</i>     |             |      |      |
| HU-LM-A19                                                      |             | 23.6 | 1.55 |
| HU-LM-A20                                                      |             | 20.7 | 1.33 |
| <b><u>Wadi Kelt</u></b>                                        |             |      |      |
| HU-WQ-A21                                                      |             | 23.9 | 1.20 |
| <b><u>Masada*</u></b>                                          |             |      |      |
| BI-7                                                           | <i>Adam</i> | NA   | NA   |

**\*In the current study, eight ancient date seeds from Masada, (Code numbers BI: 1- 8) obtained from Bar-Ilan University, Israel in 2007 were photographed prior to planting but measurements were not made. Of these, one seed (BI-7, “Adam”) was germinated in the current study.**

**Table S2. Calibrated calendar ages of germinated ancient date seeds and controls.**

| Location/sample<br>"Name"(code no.) (date*)               | Sample<br>code | pMC <sup>†</sup> | <sup>14</sup> C age<br>(uncal)<br>yBP | ±error<br>(y) | 1σ-range &<br>sub-ranges | P (%) <sup>‡</sup> | 2σ-range<br>&sub-ranges  | P<br>(%) <sup>‡</sup> |
|-----------------------------------------------------------|----------------|------------------|---------------------------------------|---------------|--------------------------|--------------------|--------------------------|-----------------------|
| <b><u>Masada</u></b>                                      |                |                  |                                       |               |                          |                    |                          |                       |
| "Adam"( BI707)                                            | UZ<br>5833     | 78.03            | 1935                                  | 35            | 25 – 122 calCE           | 68.2               | 36 calBCE – 133<br>calCE | 95.4                  |
|                                                           |                |                  |                                       |               | 25 – 89 calCE            | 54.5               | 36 – 30 calBCE           | 0.8                   |
|                                                           |                |                  |                                       |               | 102 – 122 calCE          | 13.7               | 22 – 10 calBCE           | 1.8                   |
|                                                           |                |                  |                                       |               |                          |                    | 2 calBCE – 133<br>calCE  | 92.8                  |
| * <i>Methuselah</i> (2005)<br>(Germinated Seed 3)<br>(16) | UZ<br>5397     | 79.77            | 1760                                  | 50            | 220 – 377 calCE          | 68.2               | 137 – 386 calCE          | 95.4                  |
|                                                           |                |                  |                                       |               | 220 – 347 calCE          | 66.3               |                          |                       |
|                                                           |                |                  |                                       |               | 371 – 377 calCE          | 1.9                |                          |                       |
| * <i>Control Seed 1</i> (2005)                            | UZ<br>5226     | 76.56            | 2090                                  | 50            | 176 – 47 calBCE          | 68.2               | 351 calBCE – 24<br>calCE | 95.4                  |
|                                                           |                |                  |                                       |               |                          |                    | 351 – 305 calBCE         | 4.8                   |
|                                                           |                |                  |                                       |               |                          |                    | 210 calBCE – 24<br>calCE | 90.6                  |
| <b><u>Wadi Makukh: Cave 1</u></b>                         |                |                  |                                       |               |                          |                    |                          |                       |
| <i>Hannah</i> (HUWMKA14)                                  | UZ<br>6011     | 78.06            | 1930                                  | 30            | 29 – 123 calCE           | 68.2               | 4 – 131 calCE            | 95.4                  |
|                                                           |                |                  |                                       |               | 29 – 38 calCE            | 7                  |                          |                       |
|                                                           |                |                  |                                       |               | 50 – 89 calCE            | 43.5               |                          |                       |
|                                                           |                |                  |                                       |               | 101 – 123 calCE          | 17.8               |                          |                       |
| <b><u>Qumran: Cave 13</u></b>                             |                |                  |                                       |               |                          |                    |                          |                       |
| <i>Judith</i> (HUQ13 A23)                                 | UZ<br>6168     | 77.67            | 1960                                  | 25            | 19 – 71 calCE            | 68.2               | 38 calBCE – 115<br>calCE | 95.4                  |
|                                                           |                |                  |                                       |               |                          |                    | 38 calBCE – 85<br>calCE  | 94.7                  |
|                                                           |                |                  |                                       |               |                          |                    | 111 – 115 calCE          | 0.7                   |

*Ancient*

|                                          |            |       |      |    |                         |      |                          |      |
|------------------------------------------|------------|-------|------|----|-------------------------|------|--------------------------|------|
| <b><i>Palm frond (control)</i></b>       | UZ<br>5731 | 76.88 | 2055 | 35 | 152 – 2 calBCE          | 68.2 | 171 calBCE – 21<br>calCE | 95.4 |
| <br><b><u>Qumran: Cave 37</u></b>        |            |       |      |    |                         |      |                          |      |
| <b><i>Boaz (HU37A8)</i></b>              | UZ<br>6167 | 77.47 | 1990 | 25 | 37 calBCE – 51<br>calCE | 68.2 | 44 calBCE – 63<br>calCE  | 95.4 |
|                                          |            |       |      |    | 37 – 31 calBCE          | 5.8  |                          |      |
|                                          |            |       |      |    | 21 – 11 calBCE          | 10.3 |                          |      |
|                                          |            |       |      |    | 2 calBCE – 30<br>calCE  | 37.6 |                          |      |
|                                          |            |       |      |    | 38 – 51 calCE           | 14.5 |                          |      |
| <b><i>Jonah (HU37A4)</i></b>             | UZ<br>6043 | 78.2  | 1915 | 25 | 65 – 124 calCE          | 68.2 | 25 – 134 calCE           | 95.4 |
|                                          |            |       |      |    | 65 – 92 calCE           | 36.2 |                          |      |
|                                          |            |       |      |    | 98 – 124 calCE          | 32   |                          |      |
| <b><i>Uriel (HU37A6)</i></b>             | UZ<br>6169 | 78.19 | 1915 | 25 | 65 – 124 calCE          | 68.2 | 25 – 134 calCE           | 95.4 |
|                                          |            |       |      |    | 65 – 92 calCE           | 36.2 |                          |      |
|                                          |            |       |      |    | 98 – 124 calCE          | 32   |                          |      |
| <b><i>Control seed<br/>(HU37A11)</i></b> | UZ6382     | 78.13 | 1918 | 25 | 61-124 calCE            | 68.2 | 25-132cal CE             | 95.4 |
|                                          |            |       |      |    | 61-91 calCE             |      |                          |      |
|                                          |            |       |      |    | 99-124 calCE            |      |                          |      |

\*Samples from previous 2005 study (16), <sup>†</sup> pMC = percent of modern carbon,

<sup>‡</sup> P = probability.

**Table S3. Size parameters of 18 ungerminated ancient date seeds retrieved from potting soil.**

| <b>ID Code No.</b> | <b>Width<br/>(mm)</b> | <b>Length<br/>(mm)</b> |
|--------------------|-----------------------|------------------------|
| <b>HU-37-A1</b>    | 10.5                  | 26.7                   |
| <b>HU-37-A2</b>    | 10.0                  | 28.8                   |
| <b>HU-37-A5</b>    | 10.1                  | 31.0                   |
| <b>HU-37-A3</b>    | 9.9                   | 30.8                   |
| <b>HU-37-A7</b>    | 10.2                  | 33.1                   |
| <b>HU-37-A9</b>    | 10.8                  | 30.0                   |
| <b>HU-37-A10</b>   | 10.0                  | 27.3                   |
| <b>HU-37-A11</b>   | 10.4                  | 23.6                   |
| <b>HU-37-A13</b>   | 8.6                   | 19.9                   |
| <b>HU-LM-A19</b>   | 11.0                  | 23.6                   |
| <b>HU-LM-A20</b>   | 10.9                  | 20.7                   |
| <b>HU-LMK-A15</b>  | 12.1                  | 27.0                   |
| <b>HU-LMK-A16</b>  | 10.6                  | 27.6                   |
| <b>HU-LMK-A26</b>  | 11.0                  | 31.5                   |
| <b>HU-MQ-A18</b>   | 10.0                  | 33.2                   |
| <b>HU-Q13-A24</b>  | 10.41                 | 29.8                   |
| <b>HU-Q13-A25</b>  | 10.1                  | 28.5                   |
| <b>HU-WQ-A21</b>   | 10.0                  | 23.9                   |
| <b>Mean</b>        | 10.4                  | 27.6                   |

**Table S4. Comparison of 18 ungerminated ancient date seeds with current date seeds from cultivated varieties and wild individual date palms.**

| Source                                                       | Number of Seeds | Length (mm)                               | Width (mm)                            |
|--------------------------------------------------------------|-----------------|-------------------------------------------|---------------------------------------|
| Ungerminated ancient date seeds                              | 18              | 27.62 ± 3.96<br>(min=19.87;<br>max=33.24) | 10.38 ± 0.71<br>(min=8.56; max=12.08) |
| Current seeds from cultivated varieties and wild individuals | 1108            | 19.96 ± 4.73<br>(min=11.72;<br>max=36.31) | 8.12 ± 1.05<br>(min=5.85; max=11.40)  |
| Current seeds from cultivated varieties                      | 928             | 20.60 ± 4.70<br>(min=12.78;<br>max=36.31) | 8.33 ± 1.02<br>(min=5.89; max=11.40)  |
| Current seeds from wild individuals                          | 180             | 16.69 ± 3.39<br>(min=11.72;<br>max=24.07) | 7.08 ± 0.46<br>(min=5.85; max=8.51)   |

**Table S5. Date palm varieties used for the genotyping reference matrix to compare ancient genotypes with current varieties.**

| Varieties    | Origin               | Sex |
|--------------|----------------------|-----|
| Amir Hajj    | Iraq                 | F   |
| Barhi        | Iraq                 | F   |
| Halawi       | Iraq                 | F   |
| Khadrawi     | Iraq                 | F   |
| Khastawi     | Iraq                 | F   |
| Khyara       | Iraq                 | F   |
| Tabarzal     | Iraq                 | F   |
| Zahidi       | Iraq                 | F   |
| Ashrassi     | United Arab Emirates | F   |
| Nagal        | United Arab Emirates | F   |
| Fardh female | United Arab Emirates | F   |
| Khor         | United Arab Emirates | F   |
| Fardh #4     | United Arab Emirates | M   |
| AbuKibal     | United Arab Emirates | F   |

|                     |                      |   |
|---------------------|----------------------|---|
| Hilali Saudi        | United Arab Emirates | F |
| Hilali              | United Arab Emirates | F |
| Hilali Pakistani    | United Arab Emirates | F |
| Khalass             | United Arab Emirates | F |
| Khnezi              | United Arab Emirates | F |
| Chichi              | United Arab Emirates | F |
| Abou Mâan           | United Arab Emirates | F |
| Nabtet Sultana      | United Arab Emirates | F |
| Brem                | United Arab Emirates | F |
| Rezez               | United Arab Emirates | F |
| Nabtet Ali          | United Arab Emirates | F |
| Sucary              | United Arab Emirates | F |
| Aziz                | United Arab Emirates | F |
| Lulu                | United Arab Emirates | F |
| Nabtet Soumoud      | United Arab Emirates | F |
| Nabtet Seif         | United Arab Emirates | F |
| Sagâi               | United Arab Emirates | F |
| Khsab               | United Arab Emirates | F |
| Khasif              | United Arab Emirates | F |
| Madrasa             | United Arab Emirates | F |
| Ambara              | United Arab Emirates | F |
| Ammari              | Tunisia              | F |
| Arehti              | Tunisia              | F |
| Assouli Gabes       | Tunisia              | F |
| Bessir Helou        | Tunisia              | F |
| Deglet Bey          | Tunisia              | F |
| Deglet Nour         | Tunisia              | F |
| Donga Gabes         | Tunisia              | F |
| Fezzani             | Tunisia              | F |
| Gasbi               | Tunisia              | F |
| Goundi              | Tunisia              | F |
| Hamra               | Tunisia              | F |
| Hissa Gabes         | Tunisia              | F |
| Horra               | Tunisia              | F |
| Kenta               | Tunisia              | F |
| Kentichi            | Tunisia              | F |
| Khadhourî Gabes     | Tunisia              | F |
| Lagou               | Tunisia              | F |
| Lemsi Gabes         | Tunisia              | F |
| Louzi Gabes         | Tunisia              | F |
| Tazerzist           | Tunisia              | F |
| Tantabecht          | Tunisia              | F |
| Bou Feggous Tunisia | Tunisia              | F |
| Sayass Gabes        | Tunisia              | F |



|                  |         |   |
|------------------|---------|---|
| Medjoul          | Morocco | F |
| Oum Nhel         | Morocco | F |
| Bit Djejj        | Morocco | F |
| Ahardane         | Morocco | F |
| Black Bousthammi | Morocco | F |
| Jihel            | Morocco | F |
| Tadmant          | Morocco | F |
| Bouzegar         | Morocco | F |
| Aguelid          | Morocco | F |
| Mahalbit         | Morocco | F |
| Bouslikhn        | Morocco | F |
| Najda            | Morocco | F |
| Tarzaoua         | Morocco | F |
| Oskri            | Morocco | F |
| Bourer           | Morocco | F |
| Hafsa            | Morocco | F |
| Hayani           | Egypt   | F |
| Malakabi         | Egypt   | F |
| Deqqna           | Egypt   | F |
| Wardi            | Egypt   | F |
| Beda Rufaya      | Egypt   | F |
| Qaraqoda         | Egypt   | F |
| Rotob            | Egypt   | F |
| Samany           | Egypt   | F |
| Tagtagt          | Egypt   | F |
| Ghazâli          | Egypt   | F |
| Aghram Aghzâl    | Egypt   | F |
| Amhat            | Egypt   | F |
| Barthamoda       | Egypt   | F |
| Barakawi         | Egypt   | F |
| Bint Aïsha       | Egypt   | F |
| Zaghloul         | Egypt   | F |
| El-Shabal        | Egypt   | F |

**Table S6. Genetic diversity within ancient genotypes and geographic date palm groups.**

|           | <b>Iraq</b> | <b>UAE</b> | <b>Tunisia</b> | <b>Morocco</b> | <b>Egypt</b> | <b>Ancient dates</b> |
|-----------|-------------|------------|----------------|----------------|--------------|----------------------|
| $N_A$     | 3.474       | 5.368      | 5.263          | 5.684          | 6.053        | 4.316                |
| $N_{A,P}$ | 3.474       | 3.421      | 3.474          | 4.105          | 4.263        | 4.316                |
| $H_e$     | 0.618       | 0.530      | 0.572          | 0.592          | 0.529        | 0.496                |
| $H_o$     | 0.532       | 0.515      | 0.554          | 0.587          | 0.587        | 0.555                |
| $F_{IS}$  | -0.155      | 0.016      | 0.005          | 0.001          | 0.112        | 0.143                |
| $A_r$     | 3.150       | 3.570      | 3.670          | 4.090          | 4.140        | 3.590                |

$N_A$ = number of alleles per group;  $N_{A,P}$ = number of alleles with a frequency >5 %;  
 $H_e$  =expected heterozygosity;  $H_o$  =observed heterozygosity;  $F_{IS}$ =fixation index values;  
 $A_r$ =allelic richness.

**Table S7. Genetic distances (Cavalli-Sforza and Edwards) (40) between ancient genotypes and current varieties.\***

|                 | <b>Uriel</b> | <b>Methuselah</b> | <b>Boaz</b> | <b>Hannah</b> | <b>Jonah</b> | <b>Judith</b> | <b>Adam</b> |
|-----------------|--------------|-------------------|-------------|---------------|--------------|---------------|-------------|
| <b>Abou_Man</b> | 0.3460       | 0.1879            | 0.4557      | 0.2212        | 0.3626       | 0.3460        | 0.1724      |
| <b>AbuKibal</b> | 0.3431       | 0.1988            | 0.3252      | 0.1626        | 0.3391       | 0.3557        | 0.1850      |
| <b>Aghra_Ag</b> | 0.3086       | 0.4155            | 0.2781      | 0.3321        | 0.2574       | 0.3862        | 0.4350      |
| <b>Aguelid</b>  | 0.2655       | 0.2529            | 0.4460      | 0.3155        | 0.3167       | 0.3655        | 0.2821      |
| <b>Ahardane</b> | 0.2476       | 0.3891            | 0.4057      | 0.4057        | 0.2350       | 0.3960        | 0.4293      |
| <b>Ambara</b>   | 0.4000       | 0.2419            | 0.4362      | 0.2752        | 0.4167       | 0.3626        | 0.2350      |
| <b>Amhat</b>    | 0.3431       | 0.2488            | 0.3724      | 0.2850        | 0.3931       | 0.2891        | 0.2460      |
| <b>Ami_Hajj</b> | 0.3557       | 0.3212            | 0.2810      | 0.2293        | 0.3183       | 0.3862        | 0.3460      |
| <b>Ammari</b>   | 0.2919       | 0.4126            | 0.2919      | 0.3155        | 0.2350       | 0.4655        | 0.3391      |
| <b>Arehti</b>   | 0.2476       | 0.3488            | 0.4626      | 0.3931        | 0.3557       | 0.3931        | 0.3114      |
| <b>Ashrassi</b> | 0.2919       | 0.3517            | 0.3988      | 0.2850        | 0.2948       | 0.4155        | 0.3350      |
| <b>Assouli</b>  | 0.3057       | 0.3252            | 0.4529      | 0.3683        | 0.3362       | 0.3862        | 0.2626      |
| <b>Aziz</b>     | 0.3086       | 0.2891            | 0.3391      | 0.2667        | 0.3391       | 0.2891        | 0.3086      |
| <b>Barakawi</b> | 0.3252       | 0.4626            | 0.3252      | 0.3626        | 0.3017       | 0.4167        | 0.4126      |
| <b>Barhi</b>    | 0.2919       | 0.2517            | 0.3557      | 0.2000        | 0.3391       | 0.3488        | 0.2850      |
| <b>Barthamo</b> | 0.2155       | 0.4167            | 0.2850      | 0.3419        | 0.2850       | 0.4695        | 0.4431      |
| <b>Beda_ruf</b> | 0.2321       | 0.3598            | 0.2919      | 0.3488        | 0.3155       | 0.3695        | 0.3931      |
| <b>Bess-Hel</b> | 0.2712       | 0.3293            | 0.5195      | 0.4029        | 0.3862       | 0.3960        | 0.3419      |
| <b>Bint_Ais</b> | 0.2821       | 0.2655            | 0.3960      | 0.2655        | 0.3862       | 0.3891        | 0.2626      |
| <b>Bit_Djej</b> | 0.2212       | 0.3557            | 0.3419      | 0.3793        | 0.2476       | 0.3764        | 0.4252      |
| <b>Bla_BoS</b>  | 0.3764       | 0.3155            | 0.3252      | 0.2683        | 0.2931       | 0.3086        | 0.3431      |
| <b>Bou_Feg</b>  | 0.2086       | 0.3293            | 0.4488      | 0.3655        | 0.3224       | 0.3960        | 0.3321      |
| <b>Bourer</b>   | 0.2976       | 0.3419            | 0.3614      | 0.3931        | 0.3045       | 0.3333        | 0.3988      |
| <b>Bouslikh</b> | 0.2448       | 0.2586            | 0.4391      | 0.3391        | 0.3264       | 0.3517        | 0.2821      |
| <b>Bouzegar</b> | 0.3362       | 0.3391            | 0.2821      | 0.2586        | 0.2695       | 0.3321        | 0.3667      |
| <b>Brem</b>     | 0.3086       | 0.2891            | 0.3391      | 0.2598        | 0.3391       | 0.2891        | 0.3086      |

|                 |               |               |               |               |               |               |               |
|-----------------|---------------|---------------|---------------|---------------|---------------|---------------|---------------|
| <b>Chichi</b>   | 0.2988        | 0.1407        | 0.3891        | 0.1879        | 0.2960        | 0.2891        | 0.1488        |
| <b>Degl_Bey</b> | 0.1821        | 0.3960        | 0.3419        | 0.4155        | 0.2683        | 0.4626        | 0.4598        |
| <b>Degl_Nou</b> | 0.2891        | 0.3224        | 0.4155        | 0.2960        | 0.2919        | 0.3862        | 0.2252        |
| <b>Deqqna</b>   | 0.3281        | 0.3655        | 0.3155        | 0.3529        | 0.3281        | 0.4500        | 0.3960        |
| <b>Donga</b>    | 0.2919        | 0.3557        | 0.3419        | 0.2793        | 0.1850        | 0.3793        | 0.3155        |
| <b>Fard_F</b>   | 0.3460        | 0.1045        | 0.4391        | 0.2017        | 0.3626        | 0.3017        | 0.1695        |
| <b>Fardh4</b>   | 0.3321        | <b>0.0948</b> | 0.4695        | 0.2224        | 0.3626        | 0.3557        | 0.1419        |
| <b>Fezzani</b>  | 0.2362        | 0.3155        | 0.4057        | 0.4529        | 0.3264        | 0.3850        | 0.3029        |
| <b>Gasbi</b>    | 0.3614        | 0.4086        | 0.3919        | 0.3488        | 0.3114        | 0.4460        | 0.4321        |
| <b>Ghazali</b>  | 0.4155        | 0.4557        | 0.4224        | 0.4195        | 0.2919        | 0.4431        | 0.4252        |
| <b>Goundi</b>   | 0.2586        | 0.3172        | 0.4626        | 0.4293        | 0.3821        | 0.3793        | 0.3155        |
| <b>Hafsa</b>    | 0.2057        | 0.3586        | 0.4460        | 0.4224        | 0.2793        | 0.3960        | 0.3529        |
| <b>Halawi</b>   | 0.3529        | 0.2362        | 0.4195        | 0.2057        | 0.3293        | 0.3960        | 0.2724        |
| <b>Hamra</b>    | 0.4293        | 0.3557        | 0.3586        | 0.3293        | 0.3752        | 0.3960        | 0.3183        |
| <b>Hayani</b>   | 0.3764        | 0.3362        | 0.3488        | 0.2752        | 0.3724        | 0.3793        | 0.2891        |
| <b>Hila_Pak</b> | 0.2988        | 0.2781        | 0.3252        | 0.2155        | 0.2960        | 0.3724        | 0.2724        |
| <b>Hila_Sau</b> | 0.3391        | 0.1143        | 0.4695        | 0.2350        | 0.3391        | 0.3155        | 0.1752        |
| <b>Hilali</b>   | 0.2224        | 0.1448        | 0.3391        | 0.2017        | 0.3362        | 0.3252        | 0.1960        |
| <b>Hissa</b>    | 0.2821        | 0.3598        | 0.3919        | 0.3793        | 0.2655        | 0.4086        | 0.3764        |
| <b>Horra</b>    | 0.2574        | 0.4488        | 0.2988        | 0.3155        | 0.2448        | 0.4098        | 0.3919        |
| <b>Jihel</b>    | <b>0.1074</b> | 0.3224        | <b>0.1017</b> | 0.2529        | 0.2448        | 0.3724        | 0.3988        |
| <b>Kenta</b>    | 0.2517        | 0.3293        | 0.4460        | 0.3724        | 0.2793        | 0.3960        | 0.3155        |
| <b>Kentichi</b> | 0.2350        | 0.3212        | 0.4931        | 0.3960        | 0.3488        | 0.4057        | 0.3960        |
| <b>Khadhour</b> | 0.2586        | 0.3293        | 0.4557        | 0.4391        | 0.3598        | 0.4252        | 0.3224        |
| <b>Khadrawi</b> | 0.3695        | 0.1919        | 0.3850        | 0.2391        | 0.2586        | 0.2821        | 0.2333        |
| <b>Khalass</b>  | 0.3764        | 0.1448        | 0.4557        | 0.1879        | 0.3431        | 0.3252        | <b>0.0960</b> |
| <b>Khasif</b>   | 0.3833        | 0.2126        | 0.4793        | 0.2350        | 0.3500        | 0.3724        | 0.1988        |
| <b>Khastawi</b> | 0.3488        | 0.2724        | 0.2557        | <b>0.1350</b> | 0.2960        | 0.3695        | 0.3183        |
| <b>Khnezi</b>   | 0.3833        | 0.1598        | 0.3683        | 0.1948        | 0.3557        | 0.3557        | 0.1781        |
| <b>Khor</b>     | 0.3557        | 0.1488        | 0.4598        | 0.1976        | 0.4057        | 0.3545        | 0.1752        |
| <b>Khsab</b>    | 0.3724        | 0.1821        | 0.3212        | 0.2029        | 0.2781        | 0.3057        | 0.2114        |
| <b>Khyara</b>   | 0.3126        | 0.2919        | 0.4362        | 0.3557        | 0.3764        | <b>0.2712</b> | 0.3126        |
| <b>Lagou</b>    | 0.2155        | 0.3195        | 0.4391        | 0.3586        | 0.3224        | 0.3960        | 0.3252        |
| <b>Lemsi</b>    | 0.2114        | 0.3391        | 0.4557        | 0.3919        | 0.3321        | 0.4224        | 0.3350        |
| <b>Louzi</b>    | 0.2626        | 0.3833        | 0.3252        | 0.3126        | 0.2224        | 0.3891        | 0.3391        |
| <b>Lulu</b>     | 0.4195        | 0.2460        | 0.4126        | 0.2391        | 0.3419        | 0.3557        | 0.1919        |
| <b>Madrasi</b>  | 0.2224        | 0.1321        | 0.3724        | 0.2391        | 0.3431        | 0.3252        | 0.2086        |
| <b>Mahalbit</b> | 0.1281        | 0.2764        | 0.3391        | 0.2695        | 0.2724        | 0.3919        | 0.3224        |
| <b>Malakabi</b> | 0.3488        | 0.4626        | 0.3195        | 0.3988        | 0.2891        | 0.4667        | 0.4321        |
| <b>Medjool</b>  | 0.3293        | 0.3931        | 0.3517        | 0.3529        | <b>0.1655</b> | 0.4155        | 0.3460        |
| <b>Nabt_Ali</b> | 0.3321        | 0.1879        | 0.3724        | 0.2017        | 0.2988        | 0.3655        | 0.1862        |
| <b>Nabt_Sei</b> | 0.3517        | 0.2143        | 0.3350        | 0.2000        | 0.2879        | 0.2931        | 0.2017        |
| <b>Nabt_Sou</b> | 0.4098        | 0.1183        | 0.4598        | 0.2310        | 0.4195        | 0.3626        | 0.1252        |
| <b>Nabt_Sul</b> | 0.4029        | 0.1534        | 0.3988        | 0.1781        | 0.4029        | 0.3098        | 0.1919        |
| <b>Nagal</b>    | 0.3362        | 0.1793        | 0.4264        | 0.2183        | 0.4362        | 0.3448        | 0.1948        |
| <b>Najda</b>    | 0.1810        | 0.3557        | 0.2172        | 0.3264        | 0.2545        | 0.3793        | 0.4029        |
| <b>Oskri</b>    | 0.2988        | 0.3683        | 0.4529        | 0.3448        | 0.3057        | 0.4293        | 0.2960        |
| <b>Oum_Nhel</b> | 0.3224        | 0.3460        | 0.3752        | 0.3155        | 0.2821        | 0.4029        | 0.3252        |

|                 |        |        |        |        |        |               |        |
|-----------------|--------|--------|--------|--------|--------|---------------|--------|
| <b>Qaraqoda</b> | 0.4252 | 0.5431 | 0.3155 | 0.4029 | 0.3586 | 0.4391        | 0.5500 |
| <b>Rezez</b>    | 0.3931 | 0.1919 | 0.4391 | 0.1879 | 0.3264 | 0.3891        | 0.1724 |
| <b>Rotob</b>    | 0.3155 | 0.4333 | 0.2695 | 0.2948 | 0.2460 | 0.3960        | 0.4126 |
| <b>Sagai</b>    | 0.4167 | 0.1643 | 0.4626 | 0.1672 | 0.3833 | 0.3488        | 0.1488 |
| <b>Samany</b>   | 0.2017 | 0.2833 | 0.2891 | 0.2391 | 0.2655 | 0.3655        | 0.2793 |
| <b>Sayass</b>   | 0.2960 | 0.3695 | 0.3517 | 0.2988 | 0.2114 | 0.3960        | 0.3419 |
| <b>Sucary</b>   | 0.3362 | 0.1752 | 0.4224 | 0.2529 | 0.2960 | 0.3086        | 0.1724 |
| <b>Tabarzal</b> | 0.3695 | 0.2695 | 0.3655 | 0.1529 | 0.2919 | 0.3557        | 0.2557 |
| <b>Tadmant</b>  | 0.2891 | 0.2350 | 0.3821 | 0.2586 | 0.3195 | <b>0.2614</b> | 0.2362 |
| <b>Tagtagt</b>  | 0.3321 | 0.4529 | 0.3252 | 0.3793 | 0.2419 | 0.4293        | 0.4333 |
| <b>TantaBec</b> | 0.2919 | 0.2310 | 0.3764 | 0.2614 | 0.3724 | 0.3126        | 0.2391 |
| <b>Tarzaoua</b> | 0.2224 | 0.3695 | 0.4252 | 0.4086 | 0.3195 | 0.4155        | 0.4167 |
| <b>Tazerzis</b> | 0.2960 | 0.2114 | 0.3891 | 0.2183 | 0.3431 | 0.3155        | 0.2167 |
| <b>Wardi</b>    | 0.3833 | 0.4764 | 0.2350 | 0.2810 | 0.3029 | 0.4529        | 0.4764 |
| <b>Zaghloul</b> | 0.2241 | 0.3419 | 0.3960 | 0.3598 | 0.3252 | 0.3431        | 0.3391 |
| <b>Zahidi</b>   | 0.2919 | 0.2712 | 0.2793 | 0.1488 | 0.3891 | 0.3764        | 0.2545 |

**\*Genetic distances between ancient genotypes and their closest current varieties are in bold.**

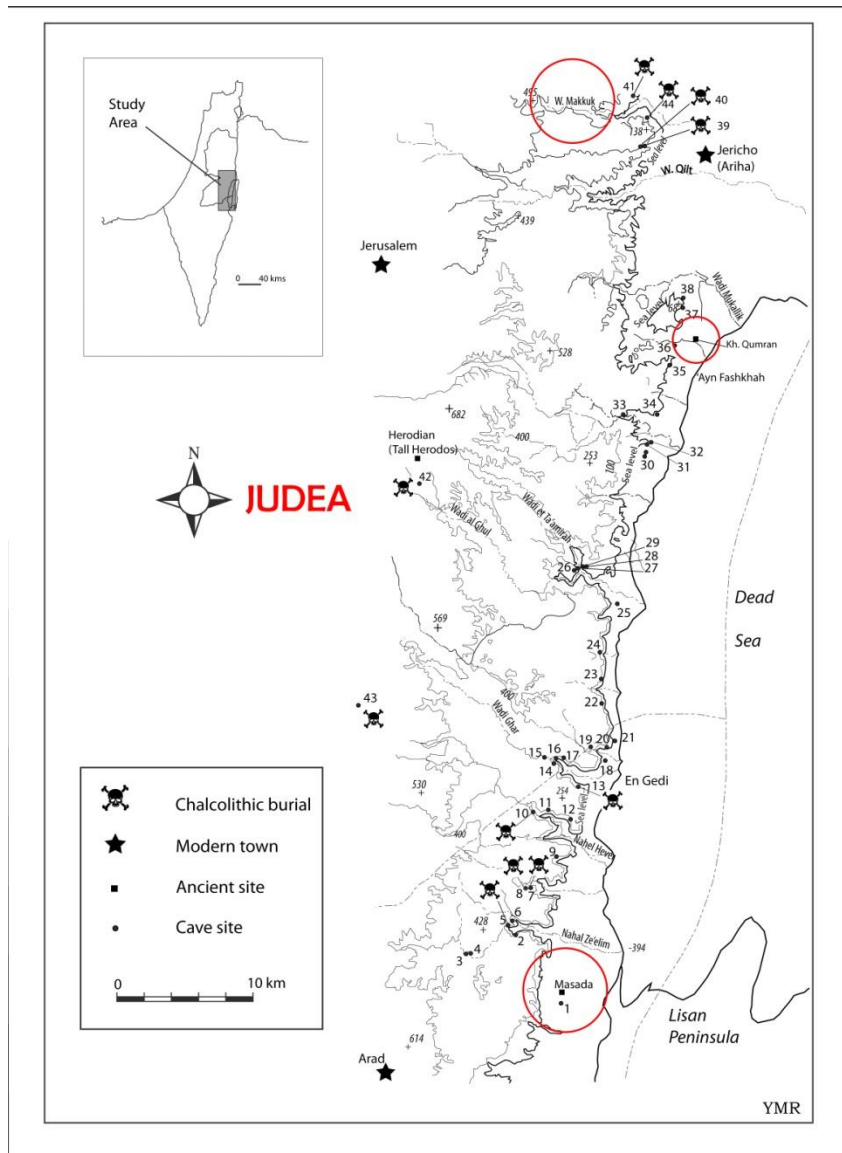

**Fig. S1. Map of Judean desert sites where ancient seeds were discovered.** Discovery sites are circled in red. (Adapted from: *The Judean Desert as a Chalcolithic Necropolis* by David Ilan and Yorke Rowan, *J. Med Archaeology* 28.2 (2015) 171-194, with the authors permission).

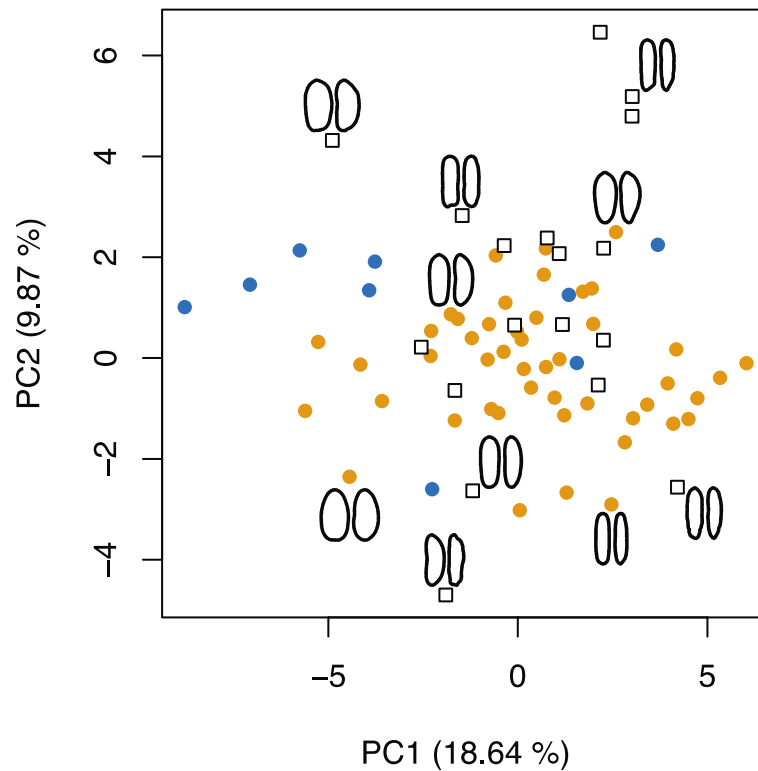

**Fig. S2. PCA comparing current and ancient date (*P. dactylifera*) seeds.** Principal Component Analysis (PCA) biplot of axes 1 - 2 (variance explained is indicated in parentheses) performed on 64 Fourier coefficients representing the dorsal and lateral seed shapes of 54 current samples represented by 20 seeds each and 18 ancient seeds. One dot/square represents one seed accession of current cultivar (orange dot), wild (blue dot) and ancient (white square). Outlines (left: dorsal side, right: lateral side; size standardized) of seeds of several *Phoenix* consensus individuals are represented.

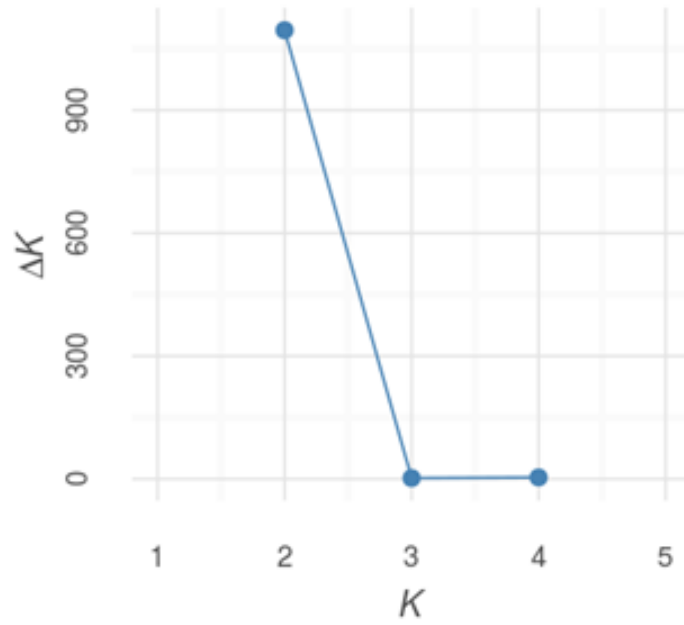

**Fig. S3. Log probabilities between  $K$  values according to (44).**  $\Delta K$  plotted against  $K$  values. The maximum value is obtained at  $k=2$  indicating that the date palm accessions were differentiated into two clusters, Eastern and Western.
